# Supplementary material for: Characterization of Two Transposable Elements and an Ultra-Conserved Element Isolated in the Genome of Zootoca vivipara (Squamata, Lacertidae)
Source: MDPI journal article supplement (doi:10.3390/life13030637), 2023-02-24
Supplement: s1 [file s1]

| Score           | Expect | Identities                                                       | Gaps      | Strand    |          |
|-----------------|--------|------------------------------------------------------------------|-----------|-----------|----------|
| 902 bits(1000)  | 00     | 511/517(99%)                                                     | 1/517(0%) | Plus/Plus |          |
| Zv516 1         |        | TAGACCCGTGGAACAAATTAAATTCGTCTAGTGAGGCACCACTGTATAGCAGTTCCTATT     |           |           | 60       |
|                 |        |                                                                  |           |           |          |
| Z.viv 67746986  |        | TAGACCCGTGGAACGAATTAAATTTGTCTAGTGAGGCACCACTGTATAGCAGTTCCTATT     |           |           | 67747045 |
|                 |        |                                                                  |           |           |          |
| Zv516 61        |        | TATCTACTTGCAATTTTGATGTGCTTTTCGAACTGCTA - GGTTGGCAGGAGCTGGGACCAAG |           |           | 119      |
|                 |        |                                                                  |           |           |          |
| Z.vivt 67747046 |        | TATCTACTTGCAATTTTGATGTGCTTTTCGAACTGCTAAGGTTGGCAGGAGCTGGGACCAAG   |           |           | 67747105 |
|                 |        |                                                                  |           |           |          |
| Zv516 120       |        | CAACAGGAGCTCACCCCGTCACAGGGATTTCGAACCGCCAACCTTCTGATCAGCAAGCCCT    |           |           | 179      |
|                 |        |                                                                  |           |           |          |
| Z.viv 67747106  |        | CAACAGGAGCTCACCCCGTCACAGGGATTTCGAACCGCCGACCTTCTGATCAGCAAGCCCT    |           |           | 67747165 |
|                 |        |                                                                  |           |           |          |
| Zv516 180       |        | AGGCTCAGTGGTTTAGCCACAGCGCCACCTGGGTCCCTATCATAGGAATAAGTGTGTCC      |           |           | 239      |
|                 |        |                                                                  |           |           |          |
| Z.viv 67747166  |        | AGGCTCAGTGGTTTAGCCACAGCGCCACCTGGGTCCCTATCATAGGAATAAGTGTGTCC      |           |           | 67747225 |
|                 |        |                                                                  |           |           |          |
| Zv516 240       |        | TAAAAACAATTGCATGAAATGTGTGATTGCATGAGAATTTTAAAGACTGACCTACCCAAA     |           |           | 299      |
|                 |        |                                                                  |           |           |          |
| Z.viv 67747226  |        | TAAAAACAATTGCATGAAATATGTGATTGCATGAGAATTTTAAAGACTGACCTACCCAAA     |           |           | 67747285 |
|                 |        |                                                                  |           |           |          |
| Zv516 300       |        | TCTCTTGATGGTCATCCTGCTCATGTAACCCCTTGGCCTTACCACAAATGCTGTTAGTTAG    |           |           | 359      |
|                 |        |                                                                  |           |           |          |
| Z.vivt 67747286 |        | TCTCTTGATGGTCATCCTGCTCATGTAACCCCTTGGCCTTACCACAAATGCTGTTAGTTAG    |           |           | 67747345 |
|                 |        |                                                                  |           |           |          |
| Zv516 360       |        | GACTGCTTGAATTTTATTTCCACAGTTATCACATTCTTTTCAGACTCGAGGCGGCTTTCA     |           |           | 419      |
|                 |        |                                                                  |           |           |          |
| Z.viv 67747346  |        | GACTGCTAGAATTTTATTTCCACAGTTATCACATTCTTTTCAGACTCGAGGCGGCTTTCA     |           |           | 67747405 |
|                 |        |                                                                  |           |           |          |
| Zv516 420       |        | GCATAGTTAAAAACATTAAAAACAGCATAATGAAAGCATTTTATCATTTTTCCAGTCACA     |           |           | 479      |
|                 |        |                                                                  |           |           |          |
| Z.viv 67747406  |        | GCATAGTTAAAAACATTAAAAACAGCATAATGAAAGCATTTTATCATTTTTCCAGTCACA     |           |           | 67747465 |
|                 |        |                                                                  |           |           |          |
| Zv516 480       |        | AAATTTATGTTGAGCTTTTCTTGAAATGGACGGGTCT                            | 516       |           |          |
|                 |        |                                                                  |           |           |          |
| Z.viv 67747466  |        | AAATTTATGTTGAGCTTTTCTTGAAATGGACGGGTCT                            | 67747502  |           |          |

**Figure S1.** Results of query in WGS archives of *Z. vivipara* with Zv516 sequence. Transitions A>G or C>T are highlighted in yellow.



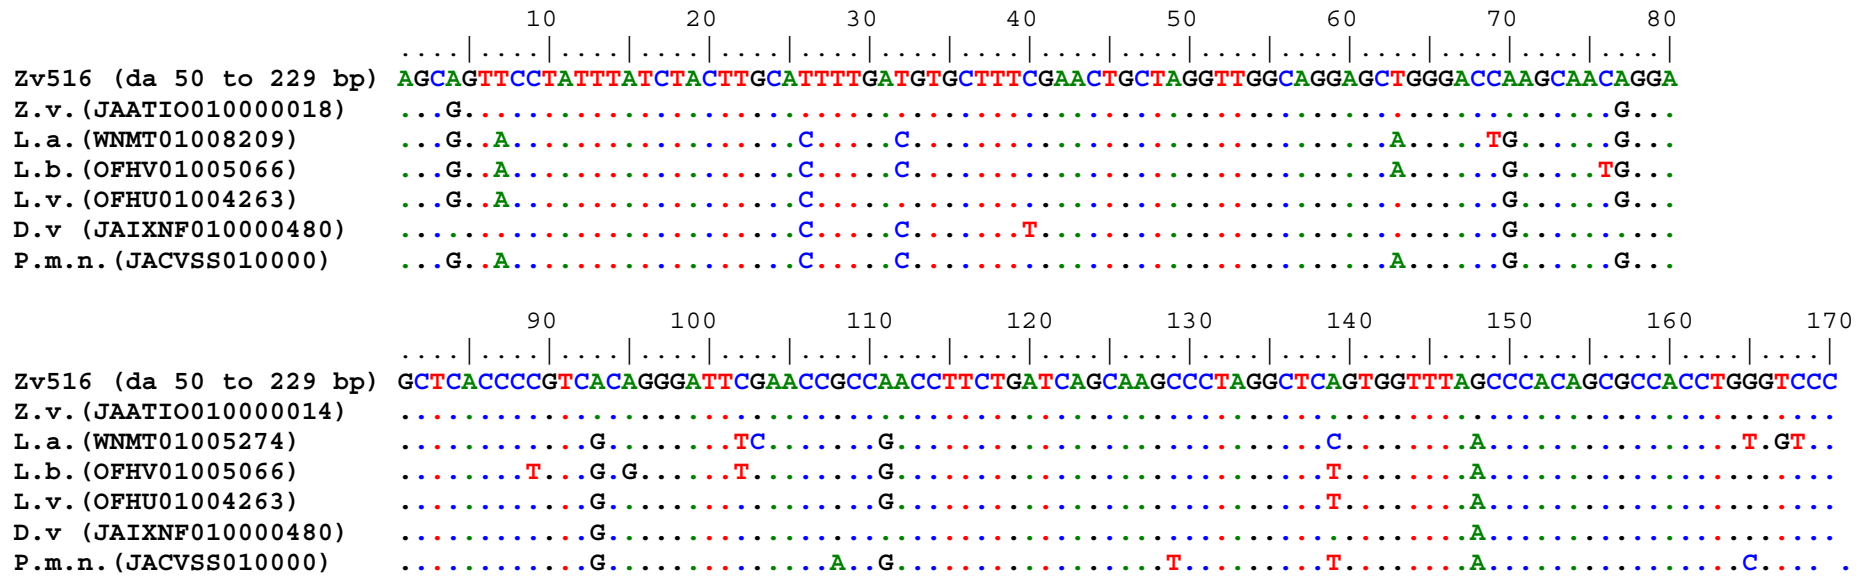

**Figure S3.** Alignments of the segment between 50 to 220 bp of ZV516 with homologous segments with highest identities of WGS of *Z. vivipara* (Z.v), *L. agilis* (L.a.), *L. bilineata* (L.b.), *L. viridis* (L.v.), and *P. m. nigriventris* (P.m.n.). In brackets, the relative accession numbers. References as in Figure S2.







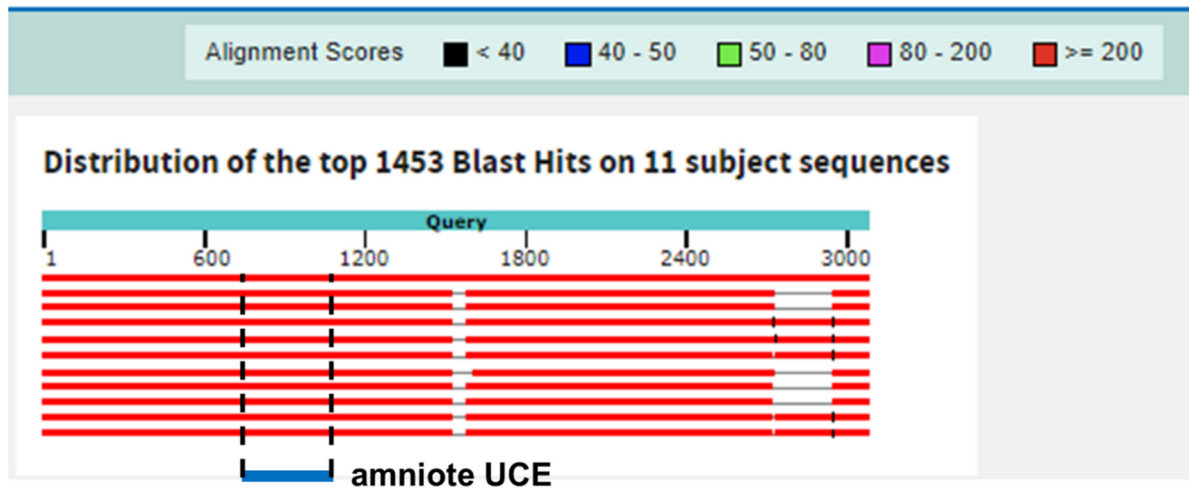

**A**

| <u>Description</u>                                                                                                | <u>Max Sc.</u> | <u>Cover</u> | <u>E value</u> | <u>Ident</u> | <u>Accession</u>  |
|-------------------------------------------------------------------------------------------------------------------|----------------|--------------|----------------|--------------|-------------------|
| Vipera berus berus isolate VBER.BE-female contig_2421, whole genome shotgun sequence                              | 5651           | 100%         | 0.0            | 100.00%      | JTGP01002421.1    |
| Crotalus horridus isolate 016-059-111 Sequence_11496_17634, whole genome shotgun sequence                         | 2303           | 91%          | 0.0            | 94.28%       | LVCR01011496.1    |
| Protobothrops mucrosquamatus DNA, contig: contig_17432, isolate: PMUCROS, whole genome shotgun sequence           | 2283           | 91%          | 0.0            | 94.14%       | BCNE02017432.1    |
| Crotalus viridis viridis voucher SPM297 chromosome 3, whole genome shotgun sequence                               | 2272           | 98%          | 0.0            | 94.01%       | PDHV02000003.1    |
| Protobothrops flavoviridis DNA, habu1_scaffold1518, whole genome shotgun sequence                                 | 2268           | 98%          | 0.0            | 93.95%       | BFFQ01001082.1    |
| Crotalus adamanteus isolate Cadam-KW1264 chromosome 3 Cadam-autosomal_3100_of_8908, whole genome shotgun sequence | 2266           | 98%          | 0.0            | 93.94%       | JADPQB010005561.1 |
| Bothrops jararaca isolate BSP84406 BJARHA_0004115, whole genome shotgun sequence                                  | 2261           | 90%          | 0.0            | 93.93%       | JAGTXL010004108.1 |
| Crotalus pyrrhus voucher UTA:R-60292 CMI_contig_188929, whole genome shotgun sequence                             | 2250           | 91%          | 0.0            | 93.75%       | JPMF01187720.1    |
| Crotalus tigris isolate CLP2741 scf7180000021597.42775, whole genome shotgun sequence                             | 2242           | 91%          | 0.0            | 93.68%       | VORL01001944.1    |
| Crotalus tigris isolate CLP2741 scf7180000021553.44426, whole genome shotgun sequence                             | 2242           | 98%          | 0.0            | 93.68%       | VORL01001924.1    |
| Crotalus tigris isolate CLP2741 scf7180000017866.186403, whole genome shotgun sequence                            | 2242           | 98%          | 0.0            | 93.68%       | VORL01000199.1    |

**B**

**Figure S7. (A)** Schematic representation of the hits obtained with the sequence flanking amniote UCE of *Vipera aspis* (in blue light in A) in WGS archive of Viperidae and **(B)** the relative description of the obtained hits (identity and coverage set > 90%).

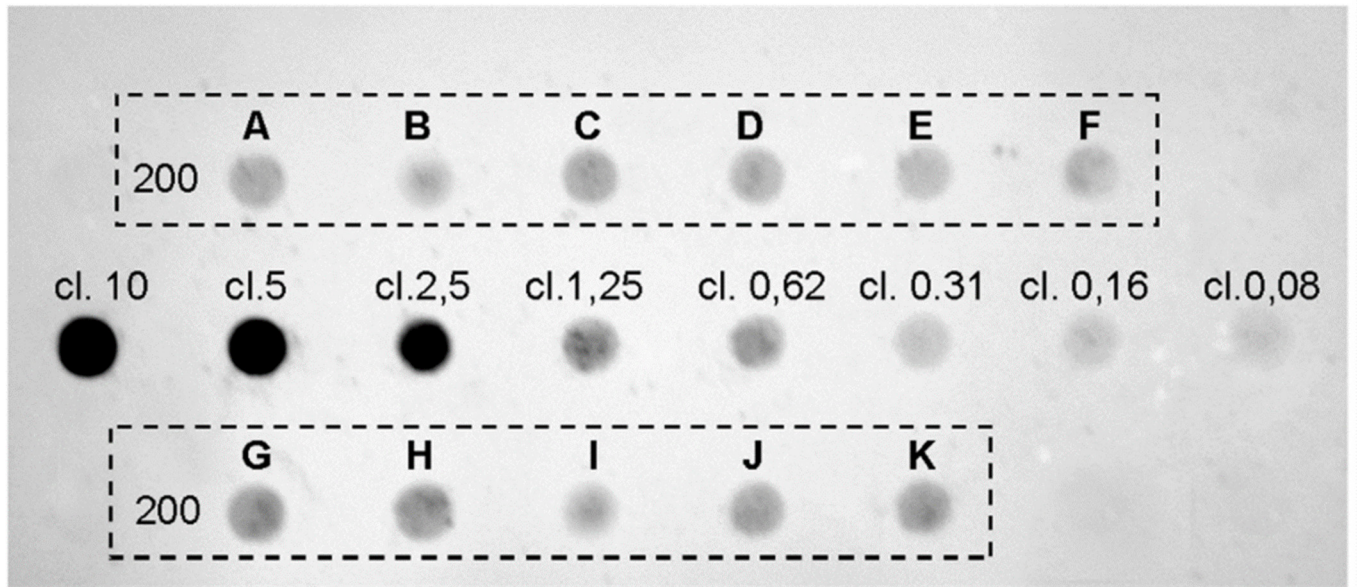

**Figure S8.** Quantitative dot blot with Zv516 probe to genomic DNA (200 ng) of a *Z. vivipara* samples (A-K) to scalar quantities (from 10 to 0.08 ng). Samples from: Osca (A=male, B=female); Oropa (C=male, D=female); Botany (E=male, F=female); Pourtalet (G=male, H=female); Pskov (I=male); Voloviz (J=female); Romania (K=female).



**Table S1.** Samples of *Z. vivipara*, with their relative clade (Surget-Groba et al., 2006), origin, sex, sex chromosome system, shape of the W chromosome and reproductive modality.

| Clade<br>(Surget-Groba<br>et al., 2006) | Origin                | Sex      | Sex<br>chromosome<br>system                                                                  | W shape                           | Reproductive<br>modality |
|-----------------------------------------|-----------------------|----------|----------------------------------------------------------------------------------------------|-----------------------------------|--------------------------|
| A                                       | Oropa<br>(Italy)      | 1 ♂, 1 ♀ | ZZ/ZW                                                                                        | microchromosome                   | oviparous                |
| A                                       | Camporosso<br>(Italy) | 1 ♀      | ZZ/ZW                                                                                        | microchromosome                   | oviparous                |
| A                                       | Fusine<br>(Italy)     | 1 ♂, 1 ♀ | ZZ/ZW                                                                                        | microchromosome                   | oviparous                |
| B                                       | Pourtalet<br>(France) | 1 ♂, 1 ♀ | Z <sub>1</sub> Z <sub>1</sub> Z <sub>2</sub> Z <sub>2</sub> /Z <sub>1</sub> Z <sub>2</sub> W | Telocentric<br>macrochromosome    | viviparous               |
| D                                       | Pskov<br>(Russia)     | 1 ♂, 1 ♀ | Z <sub>1</sub> Z <sub>1</sub> Z <sub>2</sub> Z <sub>2</sub> /Z <sub>1</sub> Z <sub>2</sub> W | Telocentric<br>macrochromosome    | viviparous               |
| D                                       | Romany                | 1 ♀      | Z <sub>1</sub> Z <sub>1</sub> Z <sub>2</sub> Z <sub>2</sub> /Z <sub>1</sub> Z <sub>2</sub> W | Submetacentric<br>macrochromosome | viviparous               |
| E                                       | Voloviz<br>(Ukraine)  | 1 ♂, 1 ♀ | Z <sub>1</sub> Z <sub>1</sub> Z <sub>2</sub> Z <sub>2</sub> /Z <sub>1</sub> Z <sub>2</sub> W | Metacentric<br>macrochromosome    | viviparous               |
| E                                       | Botany<br>(Slovakia)  | 1 ♂, 1 ♀ | Z <sub>1</sub> Z <sub>1</sub> Z <sub>2</sub> Z <sub>2</sub> /Z <sub>1</sub> Z <sub>2</sub> W | Metacentric<br>macrochromosome    | viviparous               |
| F                                       | Oscs<br>(Hungary)     | 1 ♂, 1 ♀ | ZZ/ZW                                                                                        | microchromosome                   | viviparous               |

**Table S2.** Complete list of samples used in the phylogenetic analysis.

| Sample                               | Accession Number | Reference                                |
|--------------------------------------|------------------|------------------------------------------|
| <i>Lacerta bilineata</i>             | OFHV01000637     | Kolora et al., 2019                      |
| <i>Lacerta viridis</i>               | OFHU01002950     | Kolora et al., 2019                      |
| <i>Lacerta agilis</i>                | WNMS01000006     | Gemmell et al., 2019 (unpublished)       |
| <i>Podarcis muralis nigroventris</i> | JACVSS010000004  | Feiner et al., 2020 (unpublished)        |
| <i>Pogona vitticeps</i>              | CEMB01545297     | Georges et al., 2015                     |
| <i>Zootoca vivipara</i>              | JAATIO010000004  | Yurchenko et al., 2020 (unpublished)     |
| <i>Darevskia valentin</i>            | JAIXNF010000039  | Ochkalova et al. 2022                    |
| <i>Anolis carolinensis</i>           | AAWZ02007580     | Alföldi et al., 2011                     |
| <i>Pogona vitticeps</i>              | CEMB01545297     | Georges et al., 2015                     |
| <i>Gekko japonicus</i>               | LNDG01040291     | Liu et al., 2015                         |
| <i>Crotalus viridis</i>              | PDHV02000003     | Pasquesi et al., 2018                    |
| <i>Hydrophis cyanocinctus</i>        | RSAE01483536     | Lu and Li, 2018 (unpublished)            |
| <i>Laticauda colubrina</i>           | BHFR01000097     | Kishida et al., 2019                     |
| <i>Laticauda laticaudata</i>         | BHFT01057486     | Kishida et al., 2019                     |
| <i>Ophiophagus hannah</i>            | AZIM01002741     | Vonk et al., 2013                        |
| <i>Python bivittatus</i>             | AEQU02037777     | Castoe et al., 2011                      |
| <i>Protobothrops flavoviridis</i>    | BFFQ01001082     | Shibata et al., 2018                     |
| <i>Protobothrops mucrosquamatus</i>  | BCNE02017432     | Aird et al., 2017                        |
| <i>Pseudonaja textilis</i>           | ULFR01000035     | Edwards, 2018 (unpublished)              |
| <i>Thamnophis sirtalis</i>           | LFLD01011979     | Warren & Wilson, 2015 (unpublished)      |
| <i>Thermophis baileyi</i>            | QLTV01002530     | Li et al., 2018                          |
| <i>Vipera berus</i>                  | JTGP01002421     | Liu et al., 2014 (unpublished)           |
| <i>Sphenodon punctatus</i>           | QEPC01012035     | Rutherford & Gemmell, 2018 (unpublished) |
| <i>Apalone spinifera</i>             | APJP01387532     | Minx et al., (unpublished)               |
| <i>Terrapene mexicana</i>            | PRFB02000111     | Deem & Warren, 2018 (Unpublished)        |
| <i>Chrysemys bellii</i>              | NC_024225        | Shaffer et al., 2013                     |
| <i>Platysternon megacephalum</i>     | QXTE01000205     | Gong, 2019 (Unpublished)                 |
| <i>Malaclemys terrapin</i>           | MDXI01003495     | Pop et al., 2016 (Unpublished)           |
| <i>Malaclemys terrapin</i>           | MDXI01003563     | Pop et al., 2016 (Unpublished)           |
| <i>Pelodiscus sinensis</i>           | AGCU01030334     | Wang et al., 2013                        |
| <i>Pelodiscus sinensis</i>           | AGCU01030335     | Wang et al., 2013                        |
| <i>Cuora amboinensis</i>             | SCPV01025202     | Minx & Bermingham, 2019 (Unpublished)    |
| <i>Cuora mccordi</i>                 | RQSS01010584     | Minx & Bermingham, 2019 (Unpublished)    |
| <i>Chelonia mydas</i>                | AJIM01254912     | Wang et al., 2013                        |
| <i>Chelonoidis abingdonii</i>        | PKMU01007745     | Quesada et al., 2018 (Unpublished)       |
| <i>Crocodylus porosus</i>            | MDVP01000029     | Pham et al., 2016 (Unpublished)          |
| <i>Crocodylus porosus</i>            | JRXG02001380     | Green et al., 2014                       |
| <i>Alligator sinensis</i>            | AVPB01056796     | Wan et al., 2013 ((Unpublished)          |
| <i>Alligator mississippiensis</i>    | LPUV01000502     | Putnam et al., 2015 ((Unpublished)       |
| <i>Alligator mississippiensis</i>    | LPUU01002723     | Putnam et al., 2015 (Unpublished)        |
| <i>Gavialis gangeticus</i>           | MDVQ01000044     | Pham et al., 2016 (Unpublished)          |
| <i>Gavialis gangeticus</i>           | JRWT01216621     | Green et al., 2014                       |
| <i>Gallus gallus</i>                 | PDMY01000296     | Sohn et al., 2017 (unpublished)          |
| <i>Apteryx haastii</i>               | PTFD01000561     | Sackton et al., 2019                     |
| <i>Falco peregrinus</i>              | MLQY01000053     | Damas et al., 2016 (unpublished)         |
| <i>Ornithorhynchus anatinus</i>      | NW_001783474     | Warren et al., 2008                      |
| <i>Vombatus ursinus</i>              | NW_020954603     | Yazar, 2018 (unpublished)                |
| <i>Sarcophilus harrisii</i>          | AFEY01099549     | Miller et al., 2011                      |
| <i>Phascolarctos cinereus</i>        | NW_018343981     | Johnson et al., 2018                     |
| <i>Monodelphis domestica</i>         | NC_008802        | Mikkelsen et al., 2007                   |

|                                  |               |                                   |
|----------------------------------|---------------|-----------------------------------|
| <i>Homo sapiens</i>              | NC_000001     | Gregory et al., 2006              |
| <i>Rattus norvegicus</i>         | NC_005104     | Gregory et al., 2006              |
| <i>Eulemur fulvus</i>            | PVJU010000509 | Johnson et al., 2018 (unpunished) |
| <i>Microgale talazaci</i>        | PVJH01030361  | Johnson et al., 2018 (unpunished) |
| <i>Pipistrellus pipistrellus</i> | PVIQ01002874  | Johnson et al., 2018 (unpunished) |

**Table S3.** Results of Search in WGS archives of BLAST Taxid Lacertidae with Zv516. Nr.H. = number of hits; e-v = value; Id = identity; \* = value of the highest hit.

| Sequence                                 |       | <i>Z. viv.(a)*</i> | <i>L. agi.(b)*</i> | <i>L. bil(c)*</i> | <i>L. vir.(c)*</i> | <i>D. val.(d)*</i> | <i>P. m. nig.(e)*</i> |
|------------------------------------------|-------|--------------------|--------------------|-------------------|--------------------|--------------------|-----------------------|
| <b>Zv516 (whole sequence)</b>            | Nr. H | 1                  | ---                | ---               | ---                | ---                | ---                   |
|                                          | e-v   | 0.0                | ---                | ---               | ---                | ---                | ---                   |
|                                          | id    | 99%                | ---                | ---               | ---                | ---                | ---                   |
| <b>Zv516 (from 50 to 220 bp)</b>         | Nr. H | 4854               | >5000              | >5000             | 4188               | >5000              | 1810                  |
|                                          | e-v   | 2e-80*             | 7e-70*             | 4e-57*            | 5e-56*             | 2e-124             | 2e-68*                |
|                                          | id    | 995                | 95%                | 89%               | 90%                | 93%                | 91%                   |
| <b>Zv516 (from 220 bp to 3') 3'3'end</b> | Nr. H | 1                  | 1                  | 1                 | 1                  | 1                  | 1                     |
|                                          | e-v   | 8e-150             | 4e-128             | 82-130            | 4e-128             | 2e-124             | 1e-182                |
|                                          | id    | 99%                | 95%                | 95%               | 95%                | 93%                | 86%                   |

a = JAATIO010000004 (Yurchenko et al., 2020) [40]; b = WNMS01000006 (Gemmell et al., 2019, unpublished); c = OFHV01006883 (Kolara et al., 2019) [41]; d = JAIXNF010000029 (Ochkalova et al. 2022) [42] e = JACVSS010000004 (Feiner et al., 2020, unpublished).

**Table S4.** Search with the sequence SINE Squam 1 clone 22 of *D. raddei* (AN DQ393692) in Whole Genome Sequence archives (WGS) of therein lacertid species. \*, values referred to max and minus score of filtered hits.

| Species                         | Nr Hits |          | Score*  | Coverage* | e-value* | Similarity* | Accession Nr.*  |
|---------------------------------|---------|----------|---------|-----------|----------|-------------|-----------------|
|                                 | total   | filtered |         |           |          |             |                 |
| <i>Z. vivipara</i>              | >5000   | 23       | Max 498 | 98%       | 1e-138   | 94.15%      | JAATIO010000001 |
|                                 |         |          | Min 435 | 95%       | 3e-120   | 90.15%      | JAATIO010000434 |
| <i>L. agilis</i>                | > 5000  | 69       | Max 520 | 98%       | 2e-145   | 94.33%      | WNMS01000008    |
|                                 |         |          | Min 439 | 96%       | 5e-121   | 90.31%      | WNMT01012604    |
| <i>L. viridis</i>               | 4211    | 94       | Max 511 | 97%       | 5e-143   | 95.12%      | OFHU01004678    |
|                                 |         |          | Min 446 | 95%       | 3e-128   | 91.51%      | OFHU01004492    |
| <i>L. bilineata</i>             | > 5000  | 58       | Max 534 | 100%      | 1e-149   | 92.68%      | OFHV01006015    |
|                                 |         |          | Min 427 | 97%       | 1e-117   | 90.12%      | OFHV01003655    |
| <i>D. valentini</i>             | > 5000  | 217      | Max 628 | 100%      | 3e-178   | 94,78%      | JAIXNF010000011 |
|                                 |         |          | Min 484 | 95%       | 7e-135   | 91,30%      | JAIXNF010030895 |
| <i>P. muralis. nigroventris</i> | 1807    | 63       | Max 500 | 100%      | 1e-139   | 93.41%      | JACVSS010000004 |
|                                 |         |          | Min 438 | 97%       | 1e-120   | 91,46%      | JACVSS010000094 |

**Table S5.** Results of WGS Blast search with SINE Squam 1 of *D. raddei* in different families of Sauria.

| Family          | Species                       | Nr Hits | Score*  | Coverage* (>30%) | e-value* | Identity > 70% | Accession Nr.*   |
|-----------------|-------------------------------|---------|---------|------------------|----------|----------------|------------------|
| Agamidae        | <i>Pogona vitticeps</i>       | 16      | Max 135 | 50%              | 8e-30    | 80.32%         | CEMB01030769     |
|                 |                               |         | Min 115 | 50%              | 1e-23    | 78.68%         | CEMB01025910     |
| Dactyloidae     | <i>Anolis carolinensis</i>    | 57      | Max 141 | 50%              | 2e-31    | 79.71%         | AAWZ02025084     |
|                 |                               |         | Min 97  | 51%              | 4e-18    | 80.30%         | AAWZ02017996     |
| Phrynosomatidae | <i>Phrynosoma platyrhinos</i> | 44      | Max 145 | 30%              | 6e-32    | 89.08%         | JAIPUX010000439J |
|                 |                               |         | Min 115 | 30%              | 4e-23    | 84.75%         | AIPUX010003289   |
| Gekkonidae      | <i>Gekko japonicus</i>        | 2       | Max 134 | 43%              | 4e-29    | 81.52%         | LNDG01099016     |
|                 |                               |         | Min 132 | 42%              | 1e-28    | 81.87%         | LNDG01099339     |
| Varanidae       | <i>Varanus komodoensis</i>    | 45      | Max 134 | 48%              | 5e-29    | 79.80%         | VEXN01001127     |
|                 |                               |         | Min 104 | 43%              | 4e-20    | 78.09%         | SJPD01000048     |

**Table S6.** Results of query in Blast Search Refseq\_rna with SINE Squam 1 sequence of *Z. vivipara* (sequence 351 bp).

| Description                                                                                        | Score | Cover | Evalue | Ident  | Accession      |
|----------------------------------------------------------------------------------------------------|-------|-------|--------|--------|----------------|
| Thiamine pyrophosphokinase1 (TPK1), transcript variant X7, mRNA                                    | 348   | 64%   | 2e-91  | 94.27% | XM_035101363.1 |
| Pleckstrin homology domain containingA5 (PLEKHA5), transcript variantX12, mRNA                     | 342   | 93%   | 1e-89  | 85.67% | XM_035127630.1 |
| Plpha tubulin acetyltransferase 1(ATAT1), transcript variant X1, misc_RNA                          | 342   | 68%   | 1e-89  | 92.18% | XR_004692038.1 |
| Putative methyltransferase DDB_G0268948 (LOC118097380), transcript variant X1, mRNA                | 311   | 60%   | e-80   | 93,36  | XM_035140166.1 |
| Katanin regulatory subunit B1 like 1 (KATNBL1), transcript variant X1, mRNA                        | 279   | 62%   | 9e-71  | 89.95% | XM_035110838.1 |
| Phosphatidylinositol glycan anchor biosynthesis class Z(PIGZ), transcript variant X3, mRNA Range 1 | 104   | 68%   | 6e-18  | 88.51% | XM_035133894.1 |
| Phosphatidylinositol glycan anchor biosynthesis class Z(PIGZ), transcript variant X3, mRNA Range 2 | 95    | 68%   | 6e-18  | 78.30% | XM_035133894.1 |

**Table S7.** Results of BLAST search in Transcriptoma sequence archives (TSA) of deposited sequences of lacertid species with whole SINE Squam 1 of *Z. vivipara* (hits filtered with Identity > 70% and coverage > 60%; here reported data of sequences with maximum and minimum score for each species).

| Species                         | Nr Hits | Score*             | Coverage*<br>(> 60%) | e-value*        | Similarity*<br>(>70%) | Accession Nr.                |
|---------------------------------|---------|--------------------|----------------------|-----------------|-----------------------|------------------------------|
| <i>Zootoca vivipara</i>         | 18      | Max 409<br>Min 283 | 89%<br>60%           | 3e-111<br>2e-73 | 90.19%<br>90.65%      | GEHX01034844<br>GEHX01153091 |
| <i>Podarcis cretensis</i>       | 26      | Max 398<br>Min 276 | 79%<br>60%           | 6e-108<br>3e-71 | 92.50%<br>90.14%      | GEHS01066897<br>GEHS01072124 |
| <i>Darevskia unisexualis</i>    | 100     | Max 370<br>Min 279 | 72%<br>60%           | 1e-99<br>2e-72  | 92.94%<br>90.23%      | GEHW01278948<br>GEHW01278703 |
| <i>Parvilacerta parva</i>       | 4       | Max 364<br>Min 279 | 73%<br>60%           | 6e-98<br>2e-72  | 92.25%<br>90.23%      | GEHM01098890<br>GEHM01098903 |
| <i>Phoenicocerta troodoca</i>   | 1       | Max 324            | 70%                  | 1e-85           | 90.32%                | GEHR01069599                 |
| <i>Dinarolacerta mosorensis</i> | 7       | Max 303<br>Min 281 | 55%<br>52%           | 1e-79<br>2e-73  | 94.77%<br>94.12%      | GEHQ01010225<br>GEHQ01010227 |

**Table S8. (A)** Results of BLASTX search in deposited Squamata sequences with whole SINE Squam 1 (351 bp) of *Z. vivipara* (\*, data refer to max score alignment); **(B)** alignment with the predicted protein EYD10\_12493 of *Varanus komodoensis*.

**A**

| Specie - Description                                            | Score | Cover* | E value* | Identity* | Accession*   |
|-----------------------------------------------------------------|-------|--------|----------|-----------|--------------|
| <i>Varanus komodoensis</i> – Hypoth. protein EYD10_12493        | 54.7  | 34%    | 2e-06    | 67.50%    | KAF7240913   |
| <i>Varanus komodoensis</i> - Glut. receptor-interacting prot. 2 | 55.8  | 43%    | 5e-06    | 56.86%    | KAF7249872   |
| <i>Varanus komodoensis</i> - Growth fact. Recep.-bound prot.    | 52.4  | 28%    | 5e-05    | 78.79%    | KAF7247830   |
| <i>Zootoca vivipara</i> - Transmembrane protein 42 isoformX1    | 43.9  | 23%    | 0.022    | 70.37%    | XP_034985869 |
| <i>Zootoca vivipara</i> - cx9C motif-containing protein 4 isof. | 44.3  | 20%    | 0.027    | 83.33%    | XP_034969199 |
| <i>Varanus komodoensis</i> - Phosphatase and actin regulator    | 44.3  | 23%    | 0.041    | 74.07%    | KAF7248857   |

**B**

Hypothetical protein EYD10\_12493 [*Varanus komodoensis*]

```

Query  313  GLADQKVGGSNSCDGVSSRCLVPAPANLAVRKHVKVQVDK 194
          GL D+KV GSN  +GVSSRC VPAPANLAVRKH      +K
Sbjct  55   GLVDRKVAGSNLHNGVSSRCSVPAPANLAVRKHADASREK 94

```

**Table S9.** Results of BLAST Search in WGS archives of deposited lacertid sequences with Zv817 (Hits filtered with identity >80% and coverage > 90%).Nr.H = number of hits; E-v = value; Id = identity; \* = value of the highest hit.

| sequence                         |     | <i>Z. viv.</i> (a)* | <i>L. agi</i> (b)* | <i>L. bil.</i> (c)* | <i>L. vir</i> (d)* | <i>D. val.</i> (e)* | <i>P. m. nig.</i> (f)* |
|----------------------------------|-----|---------------------|--------------------|---------------------|--------------------|---------------------|------------------------|
| <b>Zv817 (whole sequence)</b>    | Nr. | 1                   | ---                | ---                 | ---                | ---                 | ---                    |
|                                  | e-v | 0.0                 | ---                | ---                 | ---                | ---                 | ---                    |
|                                  | id  | 98%                 | ---                | ---                 | ---                | ---                 | ---                    |
| <b>Zv817 (from 5' to 685 bp)</b> | Nr. | 1                   | 2                  | 1                   | 1                  | 1                   | 1                      |
|                                  | e-v | 0.0                 | 0.0                | 0.0                 | 0.0                | 0.0                 | 0.0                    |
|                                  | id  | 99%                 | 99%                | 97%%                | 97%                | 97                  | 97%                    |
| <b>Zv817 (from 686 bp to 3')</b> | Nr. | 504                 | 25                 | 13                  | 15                 | 536                 | 35                     |
|                                  | e-v | 2e-56               | 3e-48              | 1e-49               | 3e-51              | 1e-48               | 1e-51                  |
|                                  | id  | 98%                 | 95%                | 95%                 | 96%                | 94%                 | 96%                    |

a = JAATIO010000004 (Yurchenko et al., 2020) [40]; b = WNMS01000006 (Gemmell et al., 2019, unpublished);c = OFHV01006883 (Kolara et al., 2019) [41]; d = OFHU01004521 (Kolara et al., 2019) [41]; e = JAIXNF010025682 (Ochkalova et al., 2022) [42]; f = JACVSS010000004 (Feiner et al., 2020, unpublished).

**Table S10.** Results of search with the trait of TC1-Mariner of *P. marinus* in Whole Genome Sequence archives (WGS) of therein reptile species. \*, values refer to maximum and minimum score of filtered hits.

| Species             | Nr. Hits | Score*   | Coverage*<br>(50% - 100%) | e-value* | Similarity*<br>(70% -100%) | Accession Nr.*  |
|---------------------|----------|----------|---------------------------|----------|----------------------------|-----------------|
| <i>Z. vivipara</i>  | 96       | Max 68   | 100%                      | 3e-09    | 75.00%                     | JAATIO010000003 |
|                     |          | Min 44   | 80%                       | 0.038    | 71.70%                     | JAATIO010000145 |
| <i>L. agilis</i>    | 68       | Max 60.8 | 61%                       | 1e-07    | 79,22%                     | WNMS01000016    |
|                     |          | Min 44.6 | 55%                       | 0.038    | 74.29%                     | WNMT01000297    |
| <i>L. viridis</i>   | 37       | Max 58.1 | 58.1%                     | 6e-08    | 78.56%                     | OFHU01000839    |
|                     |          | Min 44.6 | 55.0%                     | 0,038    | 74.29%                     | OFHU01000030    |
| <i>L. bilineata</i> | 45       | Max 59.3 | 59.9%                     | 2e-06    | 72.44%                     | OFHV01006511    |
|                     |          | Min 44.6 | 55%                       | 0.038    | 74.29%                     | OFHV01000090    |
| <i>D. valentini</i> | 76       | Max 56.3 | 59.9%                     | 3e-06    | 70,63%                     | OFHV01006511    |
|                     |          | Min 42.8 | 55%                       | 0.019    | 84.21%                     | OFHV01000090    |
| <i>P. muralis.</i>  | 23       | Max 56.3 | 100%                      | 2e-05    | 71.43%                     | SIRZ01000013    |
|                     |          | Min 47.3 | 65%                       | 0.011    | 86.84%                     | JACVSS010000075 |
| Anguimorpha         | 5        | Max 54.5 | 68%                       | 4e-05    | 85.11%                     | SJPD01000010    |
|                     |          | Min 45.5 | 69%                       | 0.019    | 81.63%                     | SJPD01000003    |
| Iguania             | 57       | Max 55.4 | 99%                       | 2e-05    | 70.40%                     | CEMB01028658    |
|                     |          | Min 44.6 | 96%                       | 0.038    | 69.92%                     | CEMB01006489    |
| Gekkota             | 7        | Max 50   | 99%                       | 2e-04    | 70.40%                     | JAHVXK010001622 |
|                     |          | Min 46.5 | 76%                       | 0.007    | 72,45%                     | JAHVXK010000809 |
| Pythonidae          | 7        | Max 52.7 | 74%                       | 3e-05    | 73.40%                     | AEQU02240766    |
|                     |          | Min 44.6 | 96%                       | 0.038    | 69.92%                     | CEMB01006489    |
| Elapidae            | 1037     | Max 90.6 | 81%                       | 2e-15    | 81.00%                     | SOZL01001309    |
|                     |          | Min 42.9 | 74%                       | 0.018    | 71.58%                     | AEQU02101608    |
| Colubridae          | 1706     | Max 98.7 | 80%                       | 3e-18    | 83.25%                     | WNWU01000035    |
|                     |          | Min 42.9 | 82%                       | 0.017    | 71.43%                     | JAHWGE010095033 |
| Viperidae           | 3568     | Max 98.7 | 91.5%                     | 4e-16    | 81.63%                     | JAGTXL010000638 |
|                     |          | Min 44.6 | 79%                       | 0.047    | 71.57%                     | BCNE02002671    |
| Turtles             | 4        | Max 54.5 | 81%                       | 2e-04    | 75.00%                     | VOGN01020891    |
|                     |          | Min 49.1 | 81%                       | 0.010    | 73.53%                     | QXTE01000131    |
| Crocodylia          | 0        | -        | -                         | -        | -                          | -               |
| <i>Spheonodon</i>   | 0        | -        | -                         | -        | -                          | -               |

**Table S11.** Results of BLAST Search in Refseq\_rna of deposited sequence of Lacertide with the TC1-Mariner-like segment found in *Z. vivipara*. (hits filtered with Identity > 80% and coverage >50%). \*Refers to sequences with maximum score.

| Organism          | <i>Zootoca vivipara</i>                                                     | <i>Podarcis muralis</i>            |
|-------------------|-----------------------------------------------------------------------------|------------------------------------|
| Hits              | 286                                                                         | 75                                 |
| Score*            | 203                                                                         | 107                                |
| Cover*            | 100%                                                                        | 618                                |
| E-value*          | 6e-49                                                                       | 3e-20                              |
| Identity.*        | 96.72%                                                                      | 96.72%                             |
| Accession Number* | XM_035131993                                                                | XM_028706021                       |
| Description*      | Glycerophosphodiester phosphodiesterase 1(GDE1), transcript variantX2, mRNA | IQ motif containing E (IQCE), mRNA |

**Table S12.** Results of BLAST Search in Transcriptoma (TSA) of deposited sequence of Lacertidae with the TC1-Mariner-like segment found in *Z. vivipara* (filter: Identity > 80%; cover >50%). \* Refers to sequences with maximum score.

| Organism      | <i>Zootoca vivipara</i>                                                             | <i>Parvilacerta parva</i>                                                            | <i>Dinarolacerta mosorensis</i>                                                               |
|---------------|-------------------------------------------------------------------------------------|--------------------------------------------------------------------------------------|-----------------------------------------------------------------------------------------------|
| Hits          | 32                                                                                  | 3                                                                                    | 1                                                                                             |
| Score*        | 176                                                                                 | 99.6                                                                                 | 89.7                                                                                          |
| Cover*        | 100%                                                                                | 61%                                                                                  | 61%                                                                                           |
| E-value.*     | 1e-41                                                                               | 3e-18                                                                                | 1e-15                                                                                         |
| Identity*     | 91.80                                                                               | 90.70                                                                                | 86.84                                                                                         |
| Accession Nr, | GEHX01281806                                                                        | GEHM01028735                                                                         | GEHQ01046318                                                                                  |
| Description*  | <i>Zootoca vivipara</i> breed<br>wildtype contig281929,<br>transcribed RNA sequence | <i>Parvilacerta parva</i> breed<br>wildtype contig28751,<br>transcribed RNA sequence | <i>Dinarolacerta mosorensis</i><br>breed wildtype<br>contig46328, transcribed<br>RNA sequence |

## References

- Aird, S.D., Arora, J., Barua, A., Qiu, L., Terada, K. and Mikheyev, A.S. Population genomic analysis of a pitviper reveals microevolutionary forces underlying venom chemistry. *Genome Biology and Evolution* **2017**, 9: 2640-2649. doi:10.1093/gbe/evx199.
- Alföldi, J.; Di Palma, F.; Grabherr, M.; Williams, C.; Kong, L.; Mauceli, E.; Russell, P.; Lowe, C. B.; Glor, R.E.; Jaffe, J.D. et al. The genome of the green anole lizard and a comparative analysis with birds and mammals. *Nature* **2011**, 477, 587-591. DOI: doi:1038/nature10390
- Castoe, T.A., de Koning, J.A., Hall, K.T., Yokoyama, K.D., Gu, W., Smith, E.N., Feschotte, C., Uetz, P., Ray, D.A., Dobry, J., et al: Sequencing the genome of the Burmese python (*Python molurus bivittatus*) as a model for studying extreme adaptations in snakes. *Genome Biology* **2011**, 12: 406. <http://genomebiology.com/2011/12/7/406>.
- Georges, A.; Li, Q.; Lian, J.; O'Meally, D.; Deakin, J.; Wang, Z.; Zhang, P.; Fujita, M.; Patel, H. R.; et al. High coverage sequencing and annotated assembly of the genome of the Australian dragon lizard *Pogona vitticeps*. *GigaScience*, **2015**, 4, 45.
- Green, R.E., Braun, E.L., Armstrong, J., Earl, D., Nguyen, N., Hickey, G., Vandeweghe, M.W. et al. Three crocodilian genomes reveal ancestral patterns of evolution among archosaurs. *Science* **2014**, 346, 1254449. doi: 10.1126/science.1254449.
- Gregory, S.G., Barlow, K.F., McLay, K.E., Kaul, R., Swarbreck, D., Dunham, A., Scott, C.E. et al. The DNA sequence and biological annotation of human chromosome 1. *Nature* **2006**, 441: 315-321. doi: 10.1038/nature04727.
- Johnson, R.N., O'Meally, D., Chen, Z., Etherington, G.J., Ho, S.Y. W., Nash, W.J., Grueber, C.E. et al. Adaptation and conservation insights from the koala genome. *Nature Genetics* **2018**, 50: 1102–1111. <https://doi.org/10.1038/s41588-018-0153-5>.
- Kishida, T., Go, Y., Tatsumoto, S., Tatsumi, K., Kuraku, S., Toda, M. Loss of olfaction in sea snakes provides new perspectives on the aquatic adaptation of amniotes. *Proceedings of Royal Society B* **2019**, 286: 20191828. <http://dx.doi.org/10.1098/rspb.2019.1828>
- Kolara, S.R.R., Weigert, A., Saffari, A., Kehr, S., Walter Costa, M.B., Spröer, C., Indrischek, H., Chintalapati, M., Lohse, K., Doose, G., et al. 2019. Divergent evolution in the genomes of closely related lacertids, *Lacerta viridis* and *L. bilineata*, and implications for speciation. *Gigascience* **2019**, 8:160. doi: 10.1093/gigascience/giy160.
- Li, J-T., Gao, Y-D., Xie, L., Deng, C., Shi, P., Guan, M-L., Huang, S. et al. Comparative genomic investigation of high-elevation adaptation in ectothermic snakes. *Proceedings of the National Academy of Sciences of the United States of America* **2018**, 115: doi: 10.1073/pnas.1805348115.
- Liu, Y.; Zhou, Q.; Wang, Y.; Luo, L.; Yang, J.; Yang, L.; Liu, M.; Li, Y.; Qian, T.; Zheng, Y.; et al. *Gekko japonicus* genome reveals evolution of adhesive toe pads and tail regeneration. *Nature Communications* **2015**, 6, 10033. doi: 10.1038/ncomms10033,
- Mikkelsen, T., Wakefield, M.J., Aken, B., Amemiya, C.T., Chang, J.L., Duke, S., Garber, M. et al. Genome of the marsupial *Monodelphis domestica* reveals innovation in non-coding sequences. *Nature* 2007. 447: 167-177. doi:10.1038/nature05805.
- Miller, W., Hayesb, V.M., Ratana, A., Petersenb, D.C., Wittekindt, N.E., Millerc, J., Walenzc, B. et al. Genetic diversity and population structure of the endangered marsupial *Sarcophilus harrisii* (Tasmanian devil), *Proceedings of the National Academy of Sciences of the United States of America* **2011**, 108; 12348–12353. [www.pnas.org/cgi/doi/10.1073/pnas.1102838108](http://www.pnas.org/cgi/doi/10.1073/pnas.1102838108).
- Ochkalova S, Korchagin V, Vergun A, Urin A, Zilov D, Ryakhovsky S, Girnyk A, Martirosyan I, Zhernakova DV, Arakelyan M, Danielyan F, Kliver S, Brukhin V, Komissarov A, Ryskov A. First Genome of Rock Lizard *Darevskia valentini*



- Involved in Formation of Several Parthenogenetic Species. *Genes* (Basel). 2022 Sep 1;13(9):1569. doi: 10.3390/genes13091569.
- Pasquesi, G.I., Adams, R.H., Card, D.C., Schield, D.R., Corbin, A.B., Perry, B.W., Reyes-Velasco, J., Ruggiero, R.P., Vandewege, M.W., Shortt, J.A., Castoe, T.A. Squamate reptiles challenge paradigms of genomic repeat element evolution set by birds and mammals. *Nature Communication* **2018**, 9, 2774. <https://doi.org/10.1038/s41467-018-05279-1>.
- Sackton, T.B., Grayson, P., Cloutier, A., Hu, Z., LiuJun S 4, Wheeler, N.E., Gardner, P.P., Clarke, J.A., Baker, A.J., Clamp, M., Edwards, S.V. Convergent regulatory evolution and loss of flight in paleognathous birds. *Science* **2019**, 364: 74-78. doi: 10.1126/science.aat7244.
- Shaffer, H.B Minx, P., Warren, D.E., Shedlock, A.M., Thomson, R.C., Valenzuela, N., Abramyan, J. , et al. The Western painted turtle genome, a model for the evolution of extreme physiological adaptations in a slowly evolving lineage. *Genome Biology* **2013**, 14, R28. <http://genomebiology.com/2013/14/3/R28>.
- Shibata, H., Chijiwa, T., Oda-Ueda, N., Nakamura, H., Yamaguchi, K., Hattori, S., Matsubara, K., Matsuda, Y., Yamashita, A., Isomoto, A, et al. The habu genome reveals accelerated evolution of venom protein genes. *Scientific Reports* **2018**, 81:11300. doi:10.1038/s41598-018-28749-4.
- Vonk, F.J., Casewell, N.R., Henkel, C.V., Heimberg, A.M., Jansen,H.J., McCleary, R.J., Kerkkamp,H.M. et al. The king cobra genome reveals dynamic gene evolution and adaptation in the snake venom system. *Proceedings of the National Academy of Sciences of the United States of America* **2013**, 110: 20651-20656. <https://doi.org/10.1073/pnas.1314702110>.
- Wang, Z., Pascual-Anaya, J., Zadissa, A., Li, W., Niimura, Y., Huang, Z., Li, C. et al. The draft genomes of soft-shell turtle and green sea turtle yield insights into the development and evolution of the turtle-specific body plan. *Nature Genetics* **2013**, 45: 701–706. doi:10.1038/ng.2615.
- Warren, W.C., Hillier, L.W., Marshall Graves, J. A., Birney, E., Ponting, C. P., Grützner, F., Belov, K. et al. Genome analysis of the platypus reveals unique signatures of evolution. *Nature* **2008** 453: 175–183. doi:10.1038/nature06936.
- Yurchenko, A.A.; Recknagel, H.; Elmer K.R. Chromosome-level assembly of the common lizard (*Zootoca vivipara*) genome. *Genome Biology and Evolution* **2020**, evaa161, <https://doi.org/10.1093/gbe/evaa161.16>.
